# Supplementary material for: Influence of aqueous electrolytes on the electrochemical behavior of nitrogen-doped graphene hydrogel electrodes for supercapacitors
Source: Royal Society of Chemistry journal article supplement (doi:10.1039/d3nj03787h), 2023-01-01
Supplement: d3nj03787h1.pdf [file d3nj03787h1.pdf]

## Supporting Information

### Mechanism Studies of the Charge Contributions of Nitrogen-Doped Graphene Hydrogel Electrodes for Supercapacitors

Hui Ju<sup>a</sup>, Tongchen Liu<sup>a</sup>, Hongli Lang<sup>a</sup>, Chenjin Pu<sup>a</sup>, Xiaojing Bai<sup>a</sup>, Yong Xu<sup>a</sup>, Qianqian Tang<sup>a</sup>,

Shuxin Liu<sup>a, \*</sup>, Lin Zhang<sup>b</sup>

<sup>a</sup>College of Chemistry and Chemical Engineering, Mianyang Teachers' College, Mianyang,  
621900, China.

<sup>b</sup>Research Centre of Laser Fusion, China Academy of Engineering Physics, Mianyang, 621900,  
China.

**\*Corresponding author:** E-mail address: liushuxin88@126.com

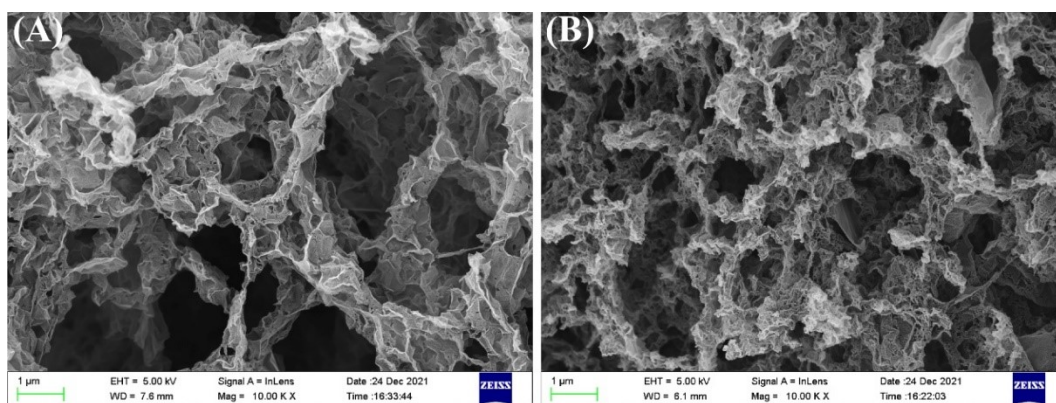

Figure S1 (A) The SEM image of rGO at a high magnification. (B) The SEM image of NDGH at a high magnification

Table S1 the percentages of micropore, mesopore and macropore in rGO and NDGH

|      | Micropores and mesopores percentage (%) | Macropores percentage (%) |
|------|-----------------------------------------|---------------------------|
| rGO  | 42                                      | 58                        |
| NDGH | 32                                      | 68                        |

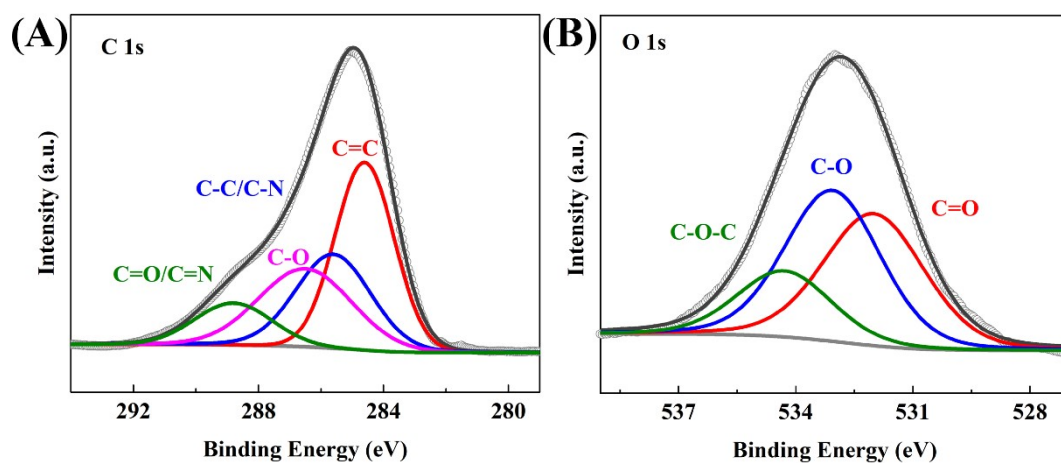

Figure S2 (A) C 1s spectrum of NDGH. (B) O 1s spectrum of NDGH.

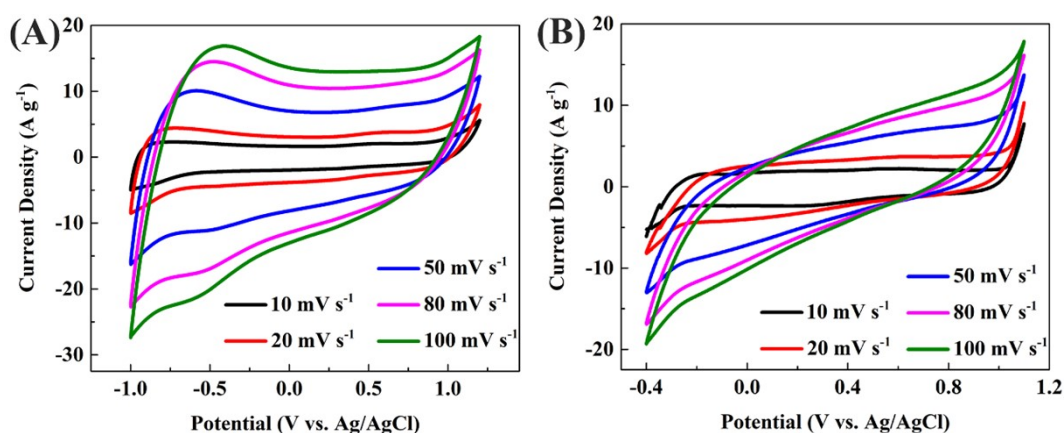

Figure S3 (A) CV curves at disparate scanning rates of NDGH in  $\text{Na}_2\text{SO}_4$ . (B) CV curves at disparate scanning rates of NDGH in  $\text{H}_2\text{SO}_4$ .

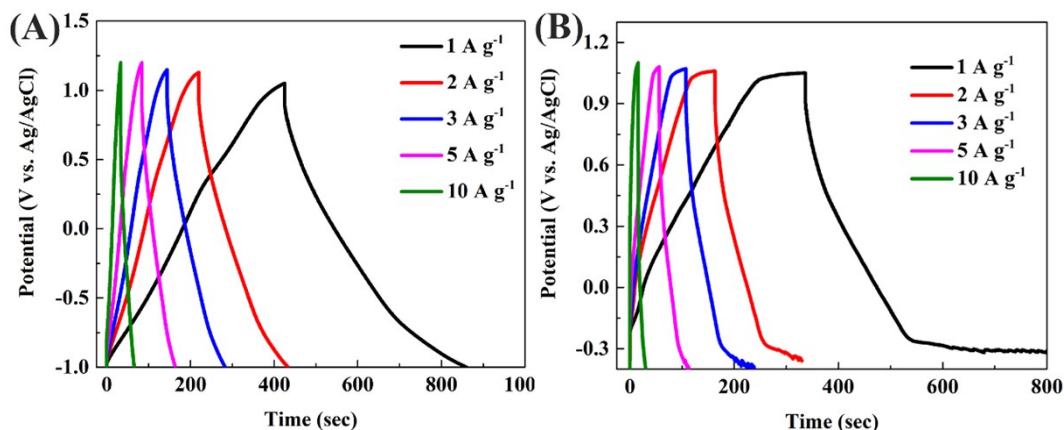

Figure S4 (A) GCD curves at disparate current densities of NDGH in  $\text{Na}_2\text{SO}_4$ . (B) GCD curves at disparate current densities of NDGH in  $\text{H}_2\text{SO}_4$ .

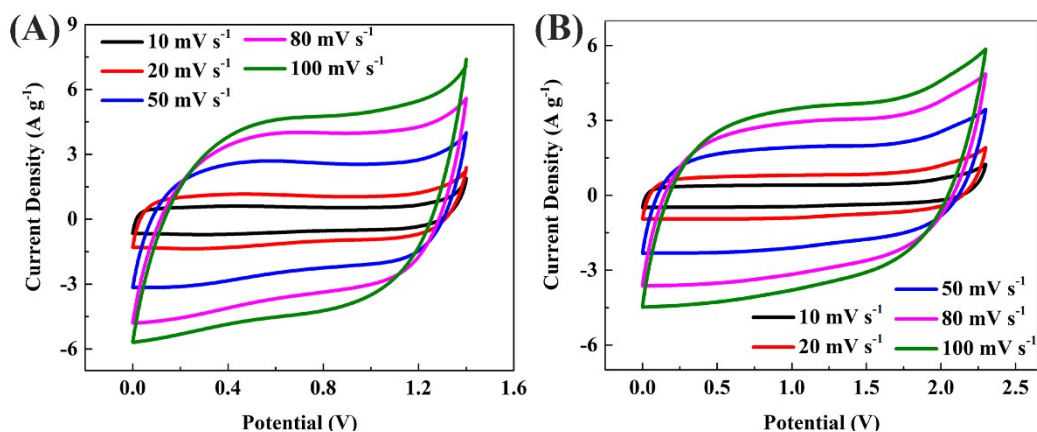

Figure S5 (A) CV curves of NDGH//NDGH- $\text{H}_2\text{SO}_4$  SSC at different scan rates. (B) CV curves of NDGH//NDGH- $\text{Na}_2\text{SO}_4$  SSC at different scan rates.

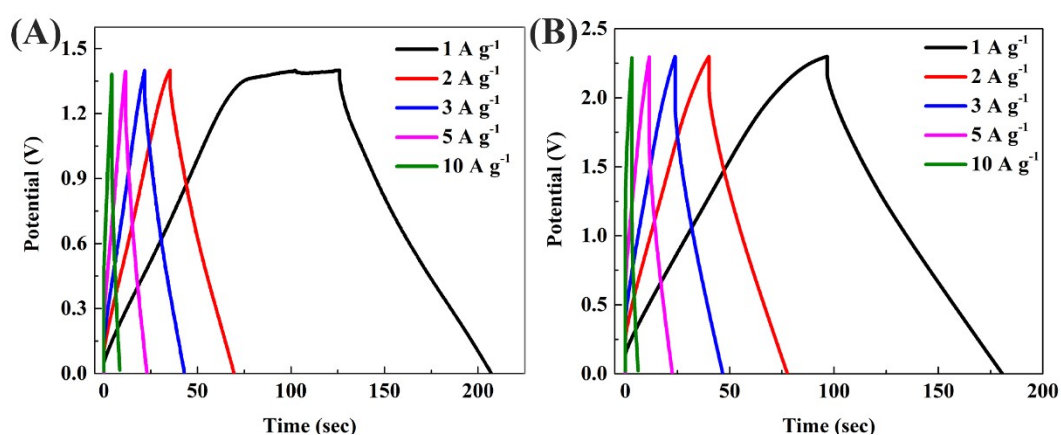

Figure S6 (A) GCD curves of NDGH//NDGH- $\text{H}_2\text{SO}_4$  SSC at disparate current densities. (B) GCD curves of NDGH//NDGH- $\text{Na}_2\text{SO}_4$  SSC at disparate current densities.
